# Supplementary material
Source: publisher figshare collection journal article supplement (https://gsajournals.figshare.com/articles/dataset/_/9701600)
Supplement: Supplementary file 1 [file 1]

```

Sub FindData()
Dim a As Long
Dim x As Long
Dim min As Long
Dim max As Long
Dim pos As Long

a = Sheets("Sheet1").Cells(Rows.Count, "B").End(xlUp).Row
pos = Sheets("Sheet1").Cells(Rows.Count, "F").End(xlUp).Row

For i = 2 To pos
x = Cells(i, "F")
j = 0
  For j = 2 To a
    min = Cells(j, "A").Value
    max = Cells(j, "B").Value
    If x >= min And x <= max Then
      Cells(i, "J") = Cells(j, "C")
    End If

  Next j

Next i

End Sub

```

**Figure S1.** Finding mutations in sequenced genomes relative to the reference sequence. A code, which was named “FindData”, and is shown in the Figure, was written in Excel VBA (Visual Basics for Application) to determine mutated positions in coding regions of genes for each strain relative to the reference sequence. The FindData code was inserted into Excel by selecting “Visual Basic Editor” under the Tools drop down menu, followed by the “Macros” sidebar menu.
