# Supplementary material
Source: publisher figshare collection journal article supplement (https://gsajournals.figshare.com/articles/dataset/_/9701600)
Supplement: Supplementary file 2 [file 1]

Nc GQDVTMIDTLREVMALFEDAQNAVFKLMASDSVPKFLRNPKEYEQLRNYDFDSITPVH-- 750  
An GDDDSMLKSLQEVVQLFEMAQTSVFKLMSSDSVPKFLRDPKYSAILQEHDVDDLIGGRS 700  
\*:\* :\*:.:\*:\*\*:\* \*\*\*.:\*\*\*\*\*:\*\*\*\*\*:\*\*\*. \*::\*.\*.:

Nc ---GQGRMVERSQRSNRT 766  
An YSPTPGNVPERSMSRSQRS 719  
\*.: \*\*\* \*\*\*:\*\*:

**Figure S3.** Sequence alignment of *flbA* proteins. The amino acid sequence of *Neurospora crassa* (Nc) *flbA* (NCU08319) and *Aspergillus nidulans* (An) *flbA* (AN5893) were aligned. Highlighted in red is the codon where a C in the coding sequence has been deleted in the *flbA* gene of *N. crassa* strains expressing high levels of *aod-1* mRNA. This deletion leads to the formation of forty codons of frame-shifted information followed by a premature stop codon and truncation of the protein. Highlighted in yellow are two DEP (Dishevelled, Egl-10 and Pleckstrin) domains which may be involved in targeting the protein to the appropriate sites on the cell membrane. Highlighted in cyan is the RGS (Regulator of G-protein signaling) domain which is necessary for interaction with the G $\alpha$  protein. Both domains are necessary for normal protein function and both are well conserved in the *N. crassa* and *A. nidulans* proteins. The frameshift mutation and truncation of the protein is predicted to render the mutated NCU08319 non-functional in high-expressing *aod-1* strains due to the loss of these domains. “\*” (asterisk) indicates positions which have a single, fully conserved amino acid residue; “:” (colon) indicates conservation between residues with strongly similar properties - scoring > 0.5 in the Gonnet PAM 250 matrix. “.” (period) indicates conservation between residues with weakly similar properties scoring  $\leq$  0.5 in the Gonnet PAM 250 matrix. Alignment was done using clustal omega (Goujon et al. 2010; Sievers et al. 2011; McWilliam et al. 2013). Identification of protein domains was achieved using the Inter-Pro protein sequence analysis and classification software at the European Bioinformatics Institute (GB) (<https://www.ebi.ac.uk/interpro/>).

Goujon, M., H. McWilliam, W. Li, F. Valentin, S. Squizzato *et al.*, 2010 A new bioinformatics analysis tools framework at EMBL-EBI. *Nucleic Acids Res* 38 (Web Server issue):W695-699.

McWilliam, H., W. Li, M. Uludag, S. Squizzato, Y.M. Park *et al.*, 2013 Analysis Tool Web Services from the EMBL-EBI. *Nucleic Acids Res* 41 (Web Server issue):W597-600.

Sievers, F., A. Wilm, D. Dineen, T.J. Gibson, K. Karplus *et al.*, 2011 Fast, scalable generation of high-quality protein multiple sequence alignments using Clustal Omega. *Mol Syst Biol* 7:539.
