# Supplementary material
Source: publisher figshare collection journal article supplement (https://gsajournals.figshare.com/articles/dataset/_/9701600)
Supplement: Supplementary file 3 [file 1]

|    |                                                               |     |
|----|---------------------------------------------------------------|-----|
| Nc | -MDTQPTSHSLFEVYLRRLRPANTVST-SGDRFLDVDVP-----EPSESAPKHITLN     | 49  |
| Mo | METPSATKDNLFKVFLRLRPPPAGVA-PSEFLTVEPQS-----SDSTSSTPTHVTLT     | 52  |
| An | --MASNSPSSLFQVYLRRLRPPISQDDQPERCLTVEKSNTSHSNNDVSSSVSVPTHITLQ  | 58  |
| Sp | -----MIQIFLRVKK--AQPSSDAS-----NKGFLTVLNDYEILLE                | 35  |
| Yl | -----MSLPVYLRRLRKDDEQPSSRPS-----SATDKPYLEIASDDPSTIITN         | 42  |
|    | : : * * * : : . : :                                           |     |
| Nc | PPAD-----RRRAIEKFAFTQVFEEDATQLDVFHCTGVAGLVEGLVAPY-GDGTDALL    | 101 |
| Mo | PPSN-----ARKHATEKYCFTQVLEEDASQLDVFQGTGVIPLIEGVLGPNNGDGTDALL   | 106 |
| An | PPSD-----ARKRGVERFGFTQVFEDEWASQLNVFEDTGLQSLIRGVLE----QRDGLV   | 108 |
| Sp | SPEDSHAYRVSKSKTLEKASFTKVFPPSCTQLDVFSTI-CAPLIADSLVN----MNDTLL  | 90  |
| Yl | PPEK-----SRTRTKEKFASFSEVFDG-STQEVEVYKKV-MLPMVKNVVTG----SGDGLL | 90  |
|    | * . : : * : * * * : . * * : : : * * :                         |     |
| Nc | ATLGVTGSGKTHTMLGTR--SQRGLTQMSLDLIYRSLGHRVLDPST--YPNLEQSIASASD | 157 |
| Mo | ATLGVTGAGKTHTLGSK--TQRGMTQLSLEVLFRSIGQNIASPGA--YPPLETSVAAYD   | 162 |
| An | ATLGVTGSGKSHTILGSK--TQRGITQMSLDVIFKSLASTIKPPDNSIPPYLLASVSASD  | 166 |
| Sp | FTLGVSAGKTYTLFGPS--DRPGVAFLALDALFYAIKGREASPQTV---FLRS----Q    | 141 |
| Yl | FAMGTTGSGKTHTLGNPRLGRPGMVHYALKSVFDAIGDRLCLFDEAE---AVAESAGP    | 147 |
|    | : * . : * * * * : * : . * . : : : .                           |     |
| Nc | PSEANILPATAYLESVYSTDPTISFLRSGNGRSTPLQNESS-----TPR--           | 202 |
| Mo | ASEATILSASAFLESVFADPHGPSRS---NSRAPTPMIGESAAPP-----LTPRRL      | 210 |
| An | ASESQMFTAQTFLEAVYGESD-----RGRNSRAQTPMSNTRAHTPMADPMPALIFPRRHA  | 221 |
| Sp | LEKCKIVEASKFLRGEA-----PLD-----IKVP-NT                         | 167 |
| Yl | NRESHVLEAIPFIDNGILTQS-----QHQLN-----QFIENAVVAE-NA             | 185 |
|    | : . : . * : : :                                               |     |
| Nc | RFRPSALPQNPDISHLTIPFDASAEYAIVISMYEVYNDRIFDLLSSPVKSA-----      | 253 |
| Mo | LNRPSSYPTIPDVGAI SVPCDPSAEYAVLVSMYEVYNNAIHDLLTPPIRSA-----     | 261 |
| An | PIRTSTLPRSPDVGHLTLELNPHSEYIVLVSMYEVYNDRIFDLLSPAIVPGQGSAMSRQG  | 281 |
| Sp | EYYAS-----HFPKIEEKNYQYAIYLSFAEIYNDRIFDLLEKASFFGHRH-----       | 212 |
| Yl | DLYSS-----VGQRSSHGVYISMVEIYNDRVFDLLDKRRPVV-----               | 222 |
|    | * . : : * * : * * * : . * * *                                 |     |
| Nc | -ATKEYRRRPLLFKPTELSPDRKVVAGLRKVVCGSLDQALMVLEAGLQERRVAGTESNTQ  | 312 |
| Mo | -ATKEYRRRALLFKATELSPDRKVVAGLKKILCTNLQQALMVLEAGLQERSVAGTNSNRT  | 320 |
| An | TSSQKDRRKPLYFKSTEGSPDRKVVAGLRKIACSTYEEALAVLEIGLTERKVTGTGANSV  | 341 |
| Sp | -----ALSLK-KSSTSDKKSIAGIQKVFVSNTTEAYKLIQKVLQLRKSTSTKSNSV      | 262 |
| Yl | -----V-KCDTKGKFGIPSQTKLFCATIQEAFQVLEQAHALRSTHSTESNSV          | 268 |
|    | . : . : . * : . * : : * . * * :                               |     |
| Nc | SSRSHGFFVVEVKKRFSLGGQHTGWYGGAGWTGNSLTIVDLA-GSERARDAKTGVQTLAE  | 371 |
| Mo | SSRSHGFFCVEVKKRRKS--RRQGHSTEAPWAGSTFTIVDLA-GSERAREAKTTGVTLAE  | 377 |
| An | SSRSHGFFCLEVKRRMRN-----KRTGEETWIGNTLTIADLAAGSERARTAKTAGSTLVE  | 396 |
| Sp | SSRSHLIMSIELFKVCTK-----SNKFESCQIDLVDLA-GSERTRSAETSGLLLRE      | 312 |
| Yl | SSRSHALFTVTVKRLG-----RTMLTTSLTIGDLA-GSERNKSTRAEGERLSE         | 315 |
|    | ***** : : : : : : : * * * * * : : . : * * *                   |     |

|    |                                                                                        |     |
|----|----------------------------------------------------------------------------------------|-----|
| Nc | AGKINESLMYLGQCLQM <del>QVAGGK</del> -EKNLGLIRRCKLTEL <del>LFTNSFPTGNN</del> ---QQQHRN  | 427 |
| Mo | AGKINESLMYFGQCLQLQATAGNSAKPTNLSFRHCKLTEL <del>ILFSNNFASNGFSKSYSARRA</del>              | 437 |
| An | AGKINESLMYLGQCLQM <del>QSGIQDGNKTAMV</del> PYRQCKLTEL <del>LFSNSF</del> PSHQT---SSMHRN | 453 |
| Sp | GASINRSL <del>LLTLGQCLEALRRKHE</del> -GKQHIIPFRQSKLTEL <del>LFSHSGHLSGLA</del> -----   | 362 |
| Yl | ACSINQSLMMLGQCLQRQ <del>REVKG</del> -YK <del>DRSILRSSKLAQ</del> LLLPVAF-SRDA-----      | 364 |
|    | . . ** . ** : : ***** : * * . ** : : * : :                                             |     |
| Nc | PQKGIMIVTADPHGDFNATSQILRYSALAKEVTVPRQPPSFP-----                                        | 469 |
| Mo | PQKGV <del>LIVNADPHGEFSSTS</del> QILRYSALACEVMAPRIPSITQ <del>TILAAA</del> AKTIHPNNHREA | 497 |
| An | PQKAIMIVTADPLGDYNATSQILRYSALAREVTVPRATSAESILSSTL-----                                  | 501 |
| Sp | --GINMLVNIDPFGSFDENAQVMRYSANAREILPPPLNENS-----                                         | 401 |
| Yl | --MTALLITANQNADFSSTIQIMRYSALARDTIKPPVTPAYLK-----                                       | 405 |
|    | : : : . : . . . . * : : * * * : * :                                                    |     |
| Nc | -----PPNSFS---NSLPPIG----SPN-----HQYLS                                                 | 490 |
| Mo | NNTMLLSSSPISSSPAVHHRPFFPPGSVAGSSNSV <del>PQYN</del> --DNSPNIQRTFSPASNSSSD              | 555 |
| An | -----GSRKGGG-----RH-----TPQLD                                                          | 516 |
| Sp | -----GSQSPSHSL <del>LQKSKNTSS</del> -----TKA                                           | 422 |
| Yl | -----RAGSGPSTPAQRAVSNSIS-S-----TGS                                                     | 429 |
| Nc | FQQTLESAALEISRLQEDLTYLRHALDSERSLR--EQAEAHLLSMEDKMVELEQAIREDC                           | 548 |
| Mo | DRATMEAAALEIARLSEELEYMRQSCETERARR--VEAEDQLLSVEDRLIDLEQEIREDC                           | 613 |
| An | LAEDLEKALAEIERLTAENERLSLRLTEEEVLR--AETETALIVSEERCLLIEQEVREEC                           | 574 |
| Sp | LTSHLEQL-----QQENQQLR-----MLLADADSEMMNLEYEIRQQM                                        | 459 |
| Yl | TMSHMSSASH-----TSHDDTKDNLIRTI <del>AALQEQLYQAQQ</del> REDALEIQIREEV                    | 478 |
|    | : . : . * * : . . : * : * :                                                            |     |
| Nc | AEEFEKRLELEVNRWKTIVDGEREREGEEFWRGKGVFERMVEADGDVDMMDVDSPKKPE                            | 608 |
| Mo | AAEFEQRLAVELARWKASMELEKERGEEHWDRKIEVYERAANVQVLATDG-DENDGDN--                           | 670 |
| An | WAEMDERMEQERKRWQA <del>AWEQTGHND</del> DHIDKKIELLSQRFQIHEDPQP-----                     | 623 |
| Sp | TREMEERVSEVERTFLTKLLEESAQ <del>IEYTDQKLEKMG</del> GWMMK <del>LQDENSE</del> KTETIA----  | 515 |
| Yl | NQEMETHMEQMRQWYLDQ <del>LQATDAAQNFTDKKISILGRRV</del> NSDN-----                         | 523 |
|    | * : : : : : * * :                                                                      |     |
| Nc | NTRLVETRTAEGQEARRQLEILADENERLQRENESLKQALAACIDPAKSTSKNKSPSRRS                           | 668 |
| Mo | -----KENVLIENLEEENTRLRREVQVLKRELLG-----RSPTKRK                                         | 706 |
| An | -----SSDERVQELEFENDRLRSKITALERELN-CRSPSKKSSSKNA-----                                   | 664 |
| Sp | -----QLEQIIIEELHEELRSLEEE-----SIKESATQQNENQHKRSSRK                                     | 555 |
| Yl | -----VSDELVKLRKE-----NQLL---KQ                                                         | 540 |
|    | : * * . :                                                                              |     |
| Nc | PSRSRRKKAQLNYAE---DDDGFFQELKRDQGD <del>MAMDGF</del> GEGNGVG---GSHGTGSPTK               | 721 |
| Mo | PLAERDDLATEDMAAPHQTGDSLHS---KMEQLRVSEVGRASSTSNSSRATVQSTAGGS                            | 762 |
| An | ALETSRNA---NILG---RESDIEVALRKMDQLKLADS-----MF-----KSPAVNTP                             | 706 |
| Sp | LLYE---DKQAIQEAHT-INTKRKLW-PQSTLIQAPNSDDE-----ENVPSPSP                                 | 599 |
| Yl | RLNV---DKENVEIAHG-PDSFRS-----D-----                                                    | 561 |
|    | : .                                                                                    |     |

|    |                                     |     |
|----|-------------------------------------|-----|
| Nc | KKRIRRLGAKKWQGLDDDPF-----           | 743 |
| Mo | PRKVRKLVAKRWDLAANDDGF-----          | 784 |
| An | GKKQRKMATRKWDLAPEDDL-----           | 726 |
| Sp | KKK--VVSPIKPLSPSRPPLTSLYSGTTDIDINEL | 633 |
| Yl | -----                               | 561 |

**Figure S2.** Alignment of selected *kin-9* homologues from species in the phylum Ascomycota. The amino acid sequences of the *Neurospora crassa* (Nc, subphylum Pezizomycotina, class Sordariomycetes) *kin-9* kinesin-like protein (NCU05180) splice variant 1, *Magnaporthe oryzae* (Mo, subphylum Pezizomycotina, class Sordariomycetes) MGG\_05060 kinesin family protein, *Aspergillus nidulans* (An, subphylum Pezizomycotina, class Eurotiomycetes) AN3124 kinesin family protein, *Schizosaccharomyces pombe* (Sp, subphylum Schizosaccharomycetina, class Schizosaccharomycetes) SPBC15D4.01c, and *Yarrowia lipolytica* (Yl, subphylum Saccharomycetina, class Saccharomycetes) YALIOE10879p proteins were aligned. The closest homologue to the *N. crassa kin-9* in the other organisms was selected for the comparison. The position of the myosin/kinesin motor domain is shown by yellow highlighting. The location of the D to N change present in the four high-expressing *aod-1 N. crassa* strains is highlighted in green at residue 740. The D residue highlighted in green is not conserved in the *S. pombe* or *Y. lipolytica* proteins. “\*” indicates positions that have a fully conserved residue; “:” indicates conservation between residues of strongly similar properties - scoring > 0.5 in the Gonnet PAM 250 matrix. “.” indicates conservation between residues of weakly similar properties scoring ≤ 0.5 in the Gonnet PAM 250 matrix. Alignment was done using clustal omega (Goujon et al. 2010; Sievers et al. 2011; McWilliam et al. 2013). Identification of protein domains was achieved using the Inter-Pro protein sequence analysis and classification software at the European Bioinformatics Institute (GB) (<https://www.ebi.ac.uk/interpro/>).

Goujon, M., H. McWilliam, W. Li, F. Valentin, S. Squizzato *et al.*, 2010 A new bioinformatics analysis tools framework at EMBL-EBI. *Nucleic Acids Res* 38 (Web Server issue):W695-699.

McWilliam, H., W. Li, M. Uludag, S. Squizzato, Y.M. Park *et al.*, 2013 Analysis Tool Web Services from the EMBL-EBI. *Nucleic Acids Res* 41 (Web Server issue):W597-600.

Sievers, F., A. Wilm, D. Dineen, T.J. Gibson, K. Karplus *et al.*, 2011 Fast, scalable generation of high-quality protein multiple sequence alignments using Clustal Omega. *Mol Syst Biol* 7:539.
