# Supplementary material
Source: publisher figshare collection journal article supplement (https://gsajournals.figshare.com/articles/dataset/_/9701600)
Supplement: Supplementary file 4 [file 1]

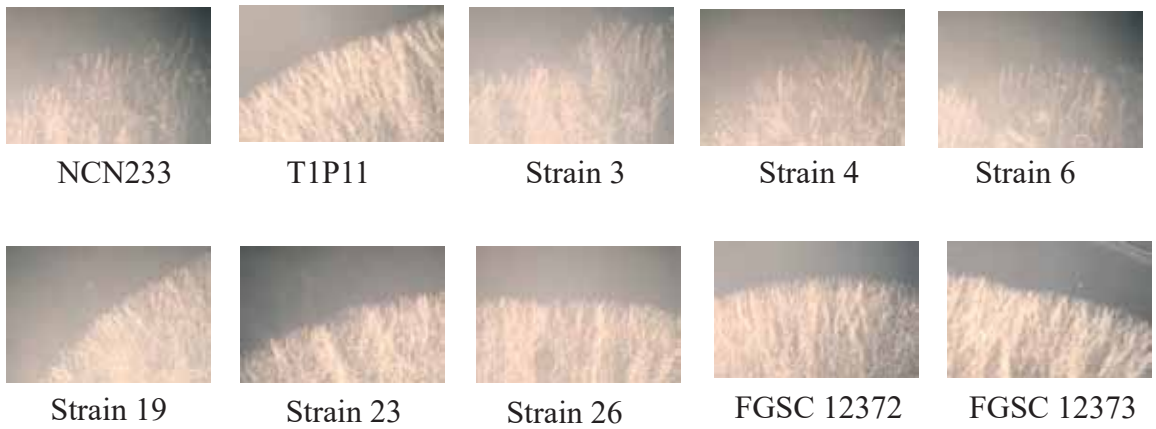

**Figure S4.** Growth phenotype of *flbA* mutants. The indicated strains were grown on agar solidified plates containing Vogel's sucrose medium plus pantothenate. Conidia were inoculated at one side of the plate and allowed to grow for 14 to 16 hr at 37 degrees C. The edge of the the growing mycelium was then photographed at 64X magnification through a stereomicroscope using an iPhone SE and a Gosky cell phone adaptor for microscope photography. Strains NCN233, 3, 4, and 6 contain the wild type *flbA* gene. Strains T1P11, 19, 23, and 26 contain the *flbA* frameshift mutation identified in this study (see Fig. 3B). Strains FGSC (Fungal Genetics Stock Center) 12372 and 12373 contain deletions of the *flbA* gene. Strains with the wild type version of *flbA* have diffuse, uneven hyphae at the growing edge, while strains with mutant versions of *flbA* have an even and compact growing edge.
